# Supplementary material for: Efficient occupancy model-fitting for extensive citizen-science data
Source: PubMed Central journal article supplement (PMC5362231; doi:10.1371/journal.pone.0174433), 2017-03-22
Supplement: pone.0174433.s001.pdf [file pone.0174433.s001.pdf]

Supporting information:  
Efficient occupancy model-fitting for extensive citizen-science data

## S1 Supplementary tables and figures

Table A: Sample of ten species used in the analysis.

| Common name              | Latin name                    | Species code |
|--------------------------|-------------------------------|--------------|
| Ringlet                  | <i>Aphantopus hyperantus</i>  | R            |
| Wall                     | <i>Lasiommata megera</i>      | W            |
| Silver-washed Fritillary | <i>Argynnis paphia</i>        | SwF          |
| Dark Green Fritillary    | <i>Argynnis aglaja</i>        | DGF          |
| Holly Blue               | <i>Celastrina argiolus</i>    | HB           |
| Grayling                 | <i>Hipparchia semele</i>      | G            |
| Large Skipper            | <i>Ochlodes sylvanus</i>      | LS           |
| Orange-tip               | <i>Anthocharis cardamines</i> | OT           |
| Green Hairstreak         | <i>Callophrys rubi</i>        | GH           |
| Small White              | <i>Pieris rapae</i>           | SW           |

Table B: Land cover classes for UK land cover data for 2007 from Morton et al. (2014), where the five combined classes are those used in this study.

| Land cover class           | Combined class |
|----------------------------|----------------|
| Broadleaf woodland         | } Woodland     |
| Coniferous woodland        |                |
| Arable                     | Arable         |
| Improved grassland         | } Grassland    |
| Semi-natural grassland     |                |
| Mountain, heath and bog    | Mountain       |
| Saltwater                  | -              |
| Freshwater                 | -              |
| Coastal                    | -              |
| Built-up areas and gardens | Urban          |

Table C: Pearson’s product moment correlation coefficients (in ascending order) between the occupancy indices from models B and C for 1976-2014 and 1995-2014, show in Figure 3 of the paper. Significant correlations are indicated by \* ( $p < 0.05$ ) and \*\* ( $p < 0.01$ ).

| Species                  | 1976- |    | 1995- |    |
|--------------------------|-------|----|-------|----|
| Green Hairstreak         | 0.59  | ** | 0.67  | ** |
| Orange-tip               | 0.61  | ** | 0.33  |    |
| Small White              | 0.73  | ** | 0.72  | ** |
| Large Skipper            | 0.73  | ** | 0.56  | *  |
| Silver-washed Fritillary | 0.75  | ** | 0.94  | ** |
| Grayling                 | 0.80  | ** | 0.78  | ** |
| Dark Green Fritillary    | 0.85  | ** | 0.85  | ** |
| Holly Blue               | 0.85  | ** | 0.98  | ** |
| Ringlet                  | 0.87  | ** | 0.90  | ** |
| Wall                     | 0.98  | ** | 0.96  | ** |

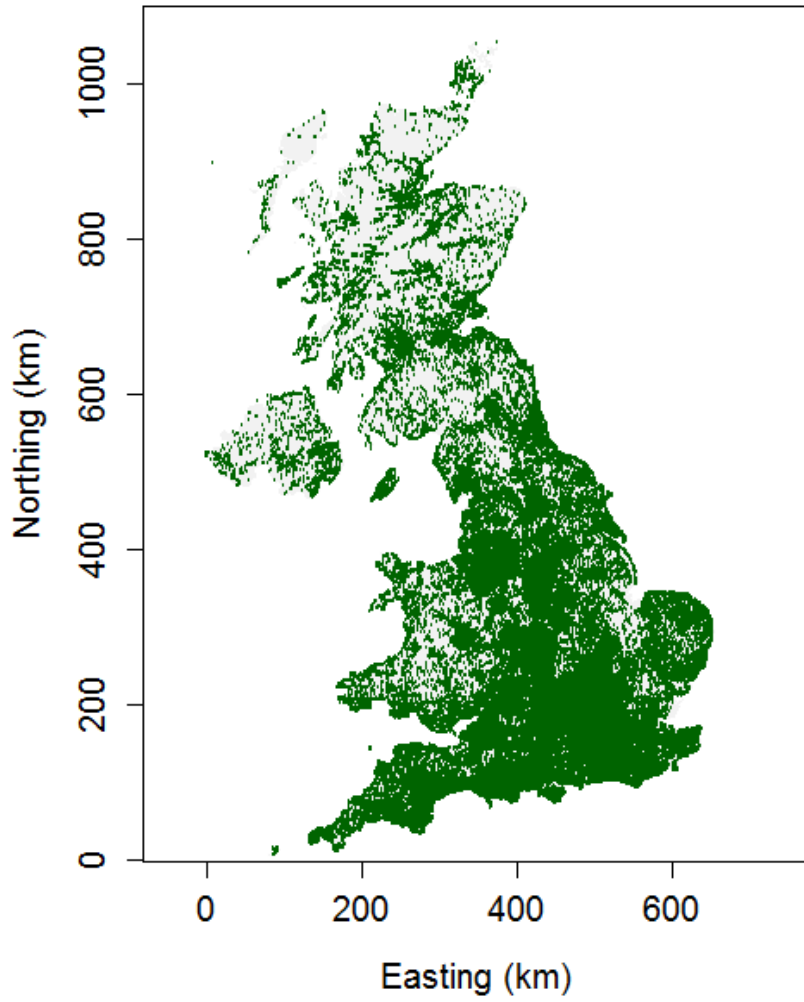

Figure A: All 1 km squares with a BNM record for 1976-2014.

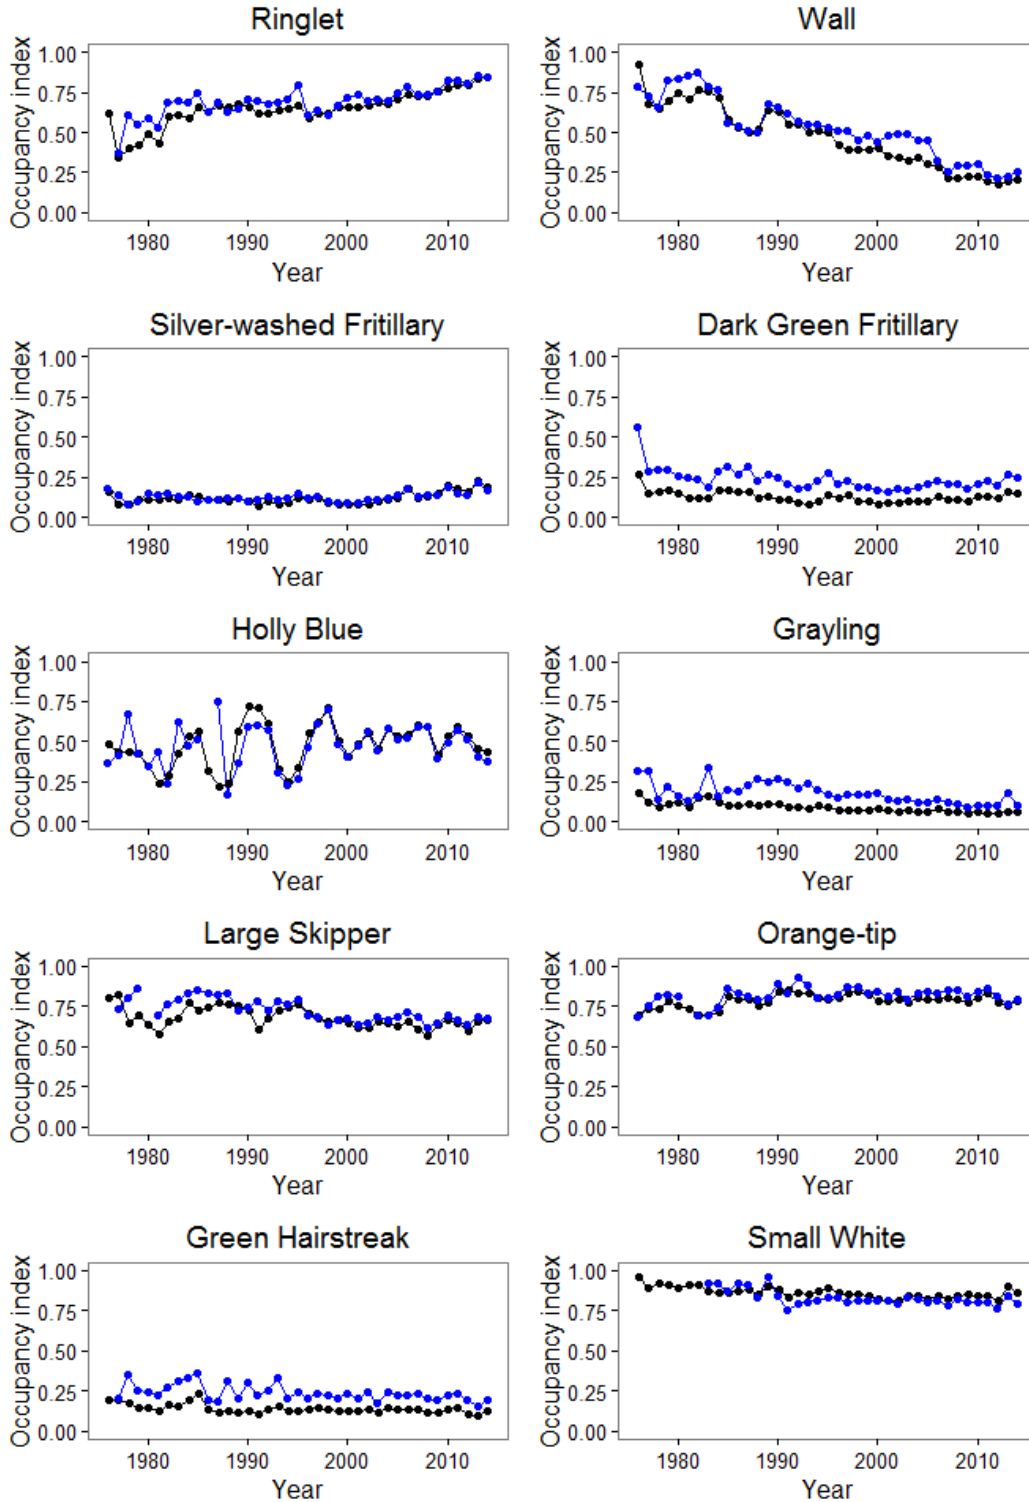

Figure B: Index comparison for models B (black) and C (blue), where the results from model C follow Fox et al. (2015), where detection probability is a function of only list length, and the data are not restricted in date. The indices from model B are identical to those in Figure 3 of the paper. There is little difference between the two analyses for recent years.

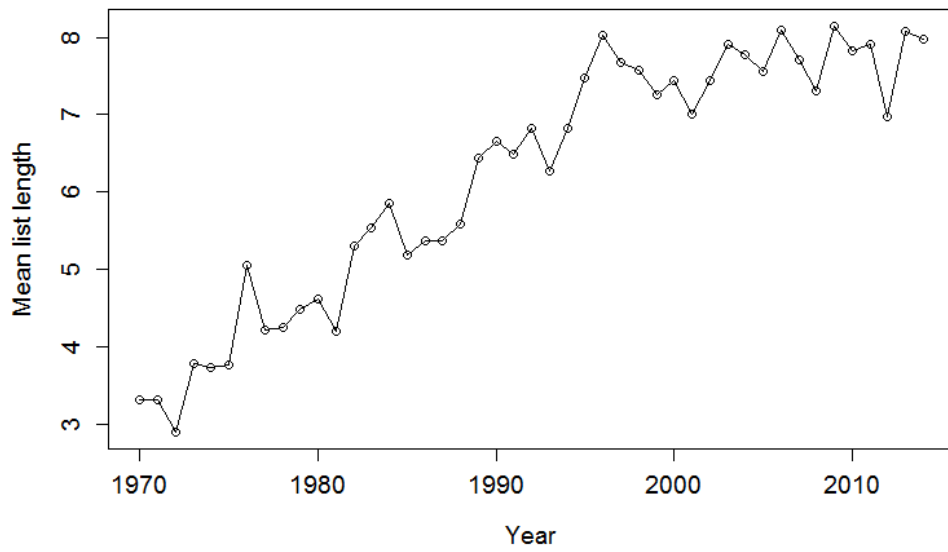

Figure C: Mean list length (across 1 km squares) per year.

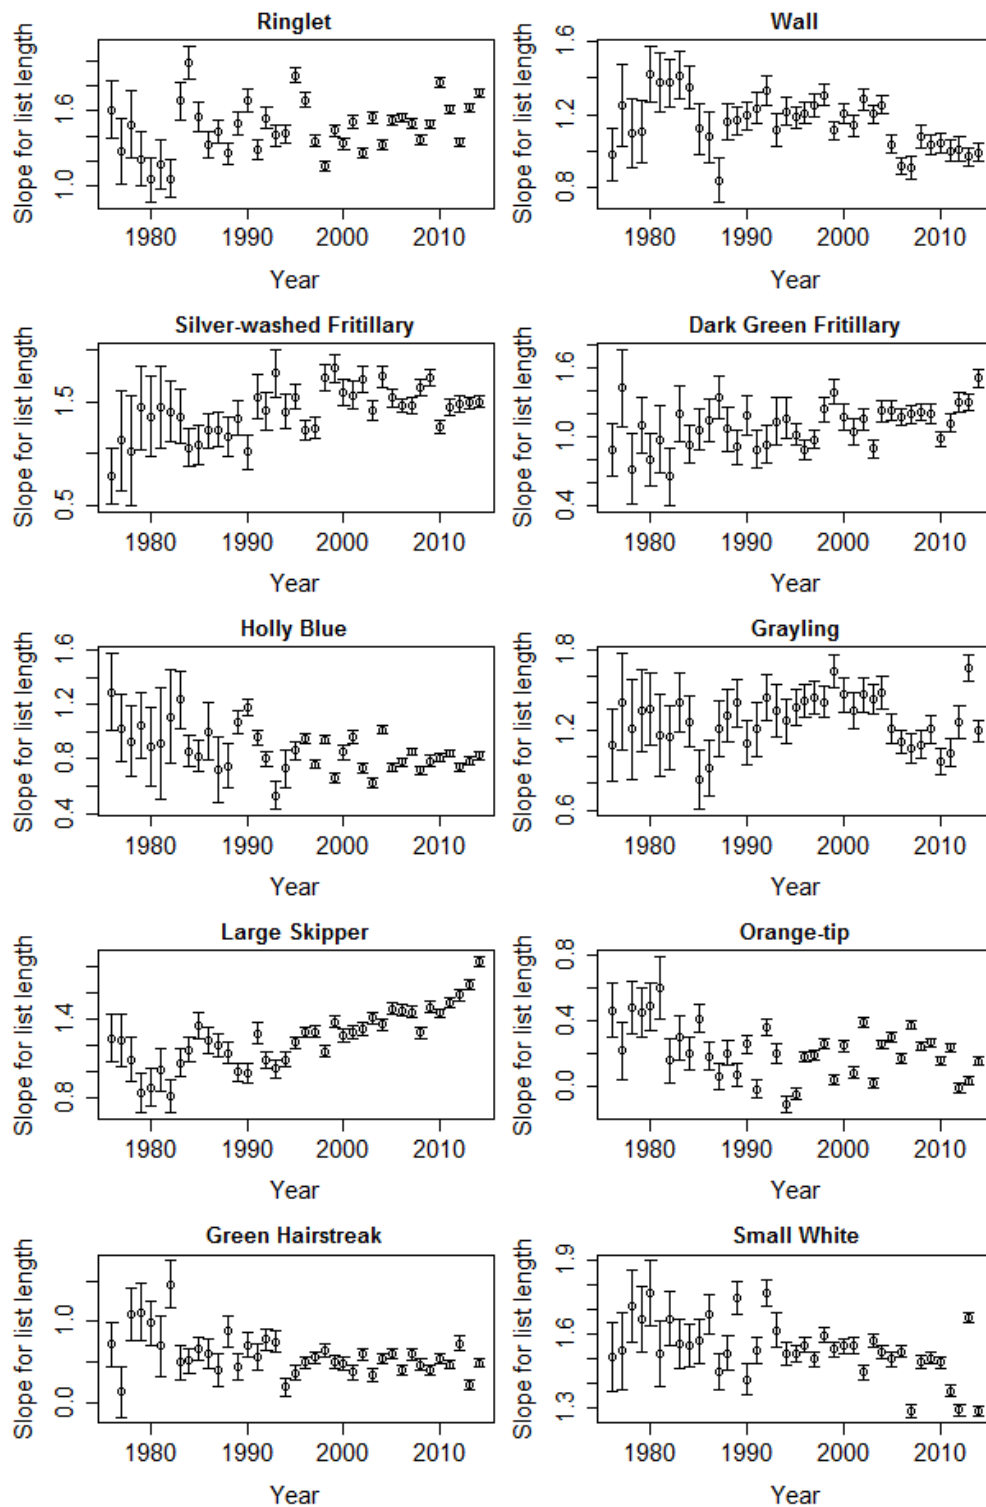

Figure D: Estimated coefficients for list length for each year and species from model C, where detection probability was considered to vary only with list length.

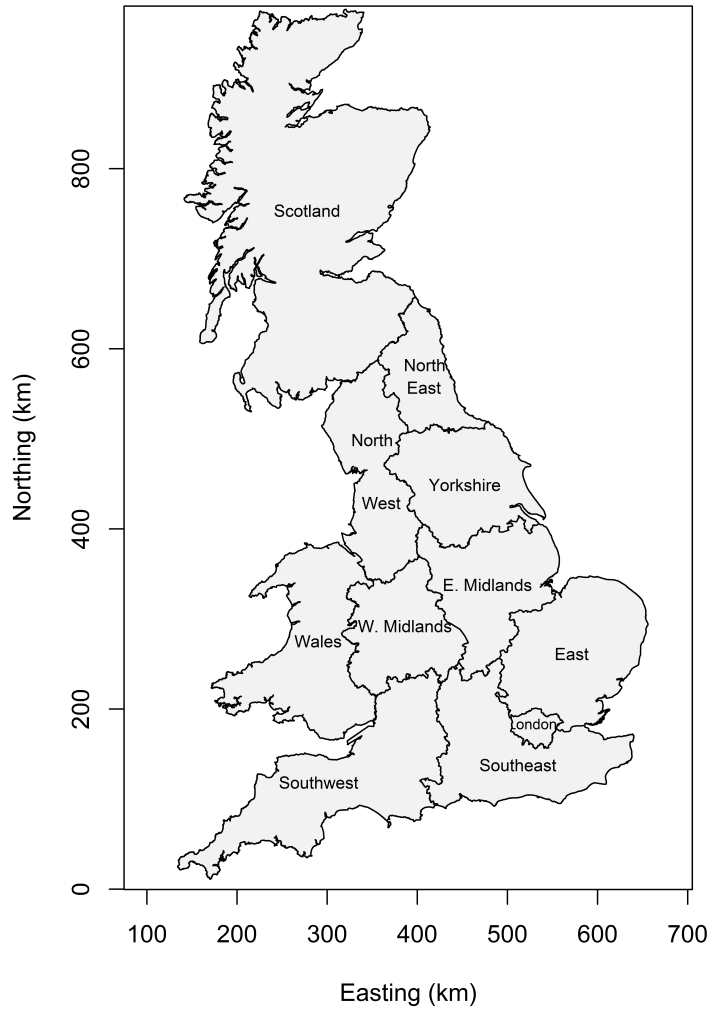

Figure E: Regions used for the computation of regional occupancy indices.
